# Supplementary material
Source: PubMed Central journal article supplement (PMC7613006)

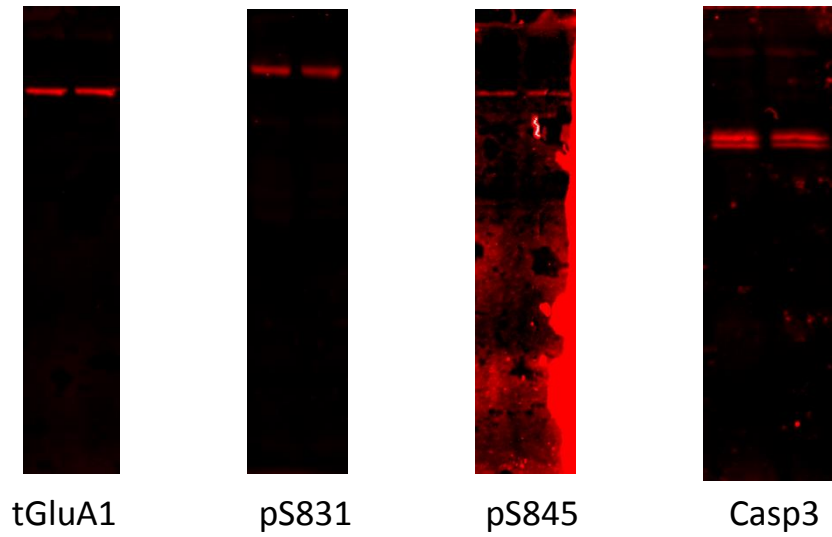

Supplemental Fig. 1. Full, untruncated images of the gels used to generate data in Fig. 4F.

Supplement: EMS146583-supplement-Supplemental_Figure.pdf [file EMS146583-supplement-Supplemental_Figure.pdf]
